# Supplementary material for: Design of Peptide-Guided Protein Degraders with Structure-Agnostic Language Models
Source: Research Square preprint supplement (doi:10.21203/rs.3.rs-1694183/v1), 2023-04-07
Supplement: Supplementary file 1 [file bccc1111299bc57b168cb5b4.pdf]

## **Supplementary Information**

### **Design of Peptide-Guided Protein Degraders with Structure-Agnostic Language Models**

Garyk Brixi,<sup>1,\*</sup> Tianzheng Ye,<sup>2,\*</sup> Kalyan Palepu,<sup>1</sup> Lauren Hong,<sup>1</sup> Vivian Yudistyra,<sup>1</sup> Sophia Vincoff,<sup>1</sup> Jayani Christopher,<sup>1</sup> Xinning Li,<sup>1</sup> Suhaas Bhat,<sup>1</sup> Connor Monticello,<sup>2</sup> Natalia Lopez-Barbosa,<sup>2</sup> Lillian Petersen,<sup>1</sup> Tian-Lai Zang,<sup>1</sup> Tong Liu,<sup>1</sup> Lin Zhao,<sup>1</sup> Sue Zhang,<sup>1</sup> Manvitha Ponnappati,<sup>1</sup> Emma Tysinger,<sup>1</sup> Teodora Stan,<sup>1</sup> Sabrina Koseki,<sup>1</sup> Matthew P. DeLisa<sup>2,3</sup> and Pranam Chatterjee<sup>1,4,5,†</sup>

1. Department of Biomedical Engineering, Duke University
2. Robert F. Smith School of Chemical and Biomolecular Engineering, Cornell University
3. Cornell Institute of Biotechnology, Cornell University
4. Department of Computer Science, Duke University
5. Department of Biostatistics and Bioinformatics, Duke University

\*These authors contributed equally

†Corresponding author: [pranam.chatterjee@duke.edu](mailto:pranam.chatterjee@duke.edu)

## **Supplementary Figures**

1. PDB-Derived dataset generation for model training.
2. Benchmarking of SaLT&PepPr on isolated interacting partner structures.
3. Inference times across peptide derivation methods.
4. Per residue pLDDT scores for AlphaFold2-Multimer co-folded proteins.
5. Characterization of SaLT&PepPr peptide-guided uAbs for diverse target protein degradation.
6. Validation of  $\beta$ -catenin degradation via mass spectrometry.
7. Example gating strategy for flow cytometry analysis.

## **Supplementary Tables**

1. SaLT&PepPr-derived peptide sequences and scores.
2. AlphaFold2-Multimer+PeptiDerive-derived peptide sequences.

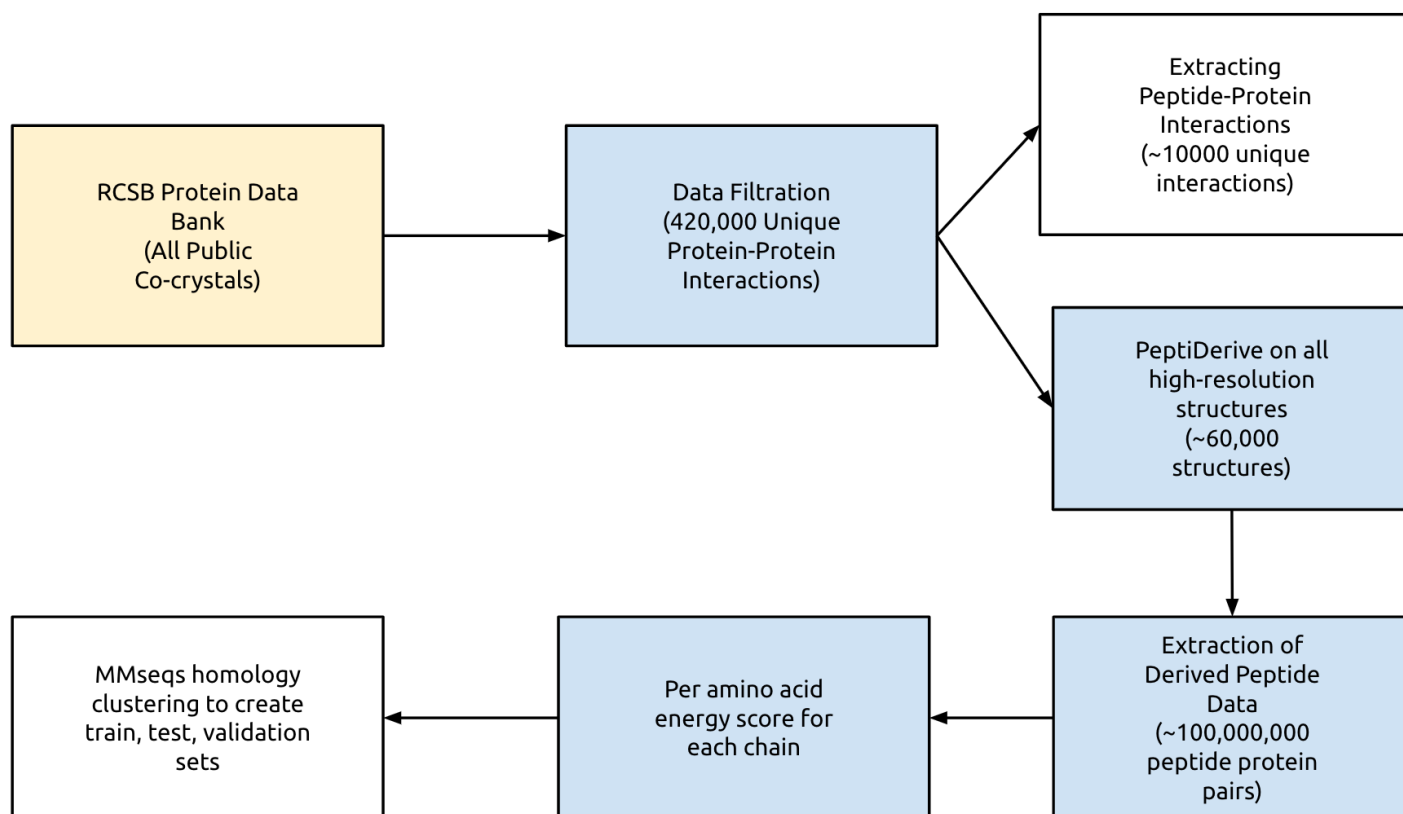

**Supplementary Figure 1. PDB-derived dataset generation for model training.** The RCSB Protein Data Bank was mined for verified, high-resolution PPI structures. Every interaction of every assembly of every co-crystal in the PDB was filtered for uniqueness (a unique pair of partners or  $>100 \text{ \AA}^2$  buried surface area for the same pair of partners), yielding 420,000 PPIs. Next, interaction structures were processed with PeptiDerive, extracting a list of derived peptide “hot sequences”, and their associated Rosetta energy unit (REU) scores on a per amino acid basis. Homology clustering was conducted for training and validation set derivation.

A

| Algorithm                     | Test (70%) | Test (homology) | Test (topology) | Test (none) | Test (all) |
|-------------------------------|------------|-----------------|-----------------|-------------|------------|
| SaLT&PepPr                    | 0.710      | 0.64            | 0.55            | 0.458       | 0.58       |
| ScanNet                       | 0.732      | 0.712           | 0.735           | 0.605       | 0.694      |
| Structural homology baseline  | 0.828      | 0.696           | 0.535           | 0.387       | 0.613      |
| Handcrafted features baseline | 0.596      | 0.567           | 0.568           | 0.432       | 0.537      |
| MaSIF-site                    | N/A        | N/A             | N/A             | N/A         | 0.533      |

B

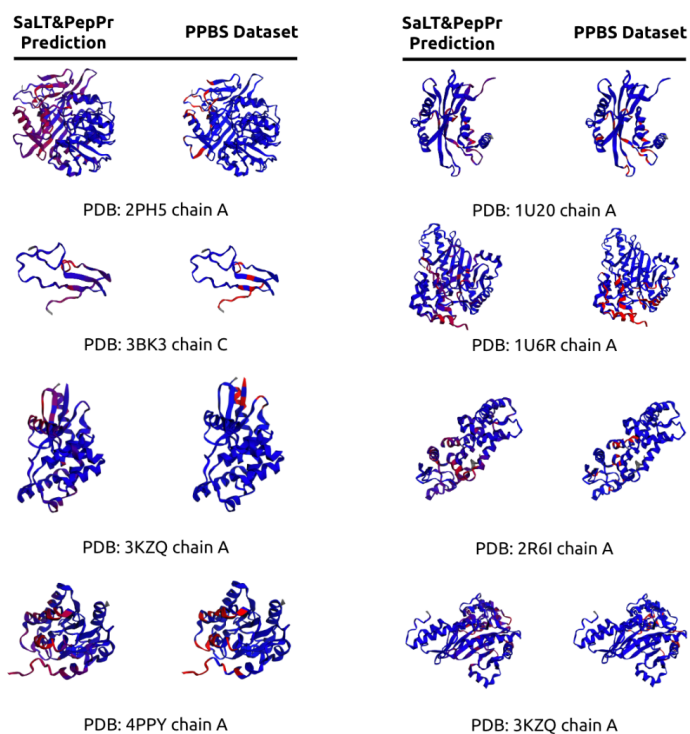

### Supplementary Figure 2. Benchmarking of SaLT&PepPr on isolated interacting partner structures.

A) Benchmarking of SaLT&PepPr trained on PPBS and then tested on different test splits. PPBS dataset, test splits, as well as model test scores are obtained from Tubiana, et al.<sup>10</sup> The PPBS dataset splits represent: 70% (at least 70% sequence homology with one training example), homology (at most 70% homology with a train set example, although at least one train set belongs to the same protein superfamily), topology (at least one train set has a similar protein topology with none in the similar protein family) and None (none of the above groups). The structural homology baseline uses template protein chains with known binding sites, a local pairwise structural comparison, and an alignment weighting scheme. The handcrafted features baseline includes 58 features based on the structural, atomic, and sequence information, with an XGBoost algorithm. Note that MaSIF-site was not retrained for the per-residue task. Additional details and implementation of baseline models and test data splits can be found in Tubiana, et al.<sup>10</sup> B) Comparison between the predicted SaLT&PepPr scores and experimentally-annotated PPBS binding sites on different protein structures in the PPBS dataset. Red indicates high binding probability amino acids, with blue as low binding probability, normalized for each protein chain.

| Target           | Known Partner    | Co-Crystal Structure                                                              | Peptide                   | Time   |
|------------------|------------------|-----------------------------------------------------------------------------------|---------------------------|--------|
| HQMKLDQDMSVDQ... | EFDGAQVHFYKQW... | 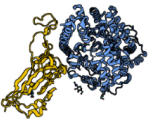 | PeptiDerive → AQVHFYKQ... | ~1 min |
| HQMKLDQDMSVDQ... | EFDGAQVHFYKQW... | AlphaFold-Multimer →                                                              | PeptiDerive → AQVHFYKQ... | ~1 hr  |
| S-RBD            | EFDGAQVHFYKQW... | SaLT & PepPr →                                                                    | AQVHFYKQ...               | ~1 min |

**Supplementary Figure 3. Inference times across peptide derivation methods.** Observed average times for inference using indicated methods are shown under “Time”. A standard machine with 2 CPU cores, 8 GB of RAM, and no GPU was used for inference.

**A**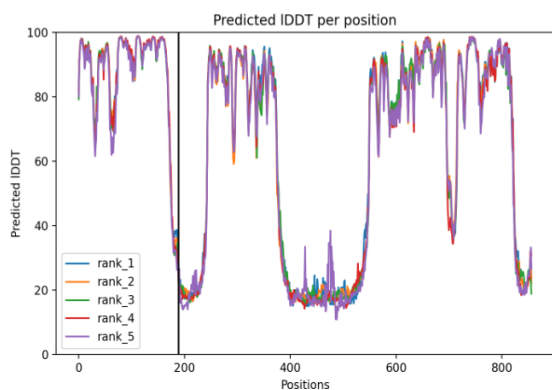**B**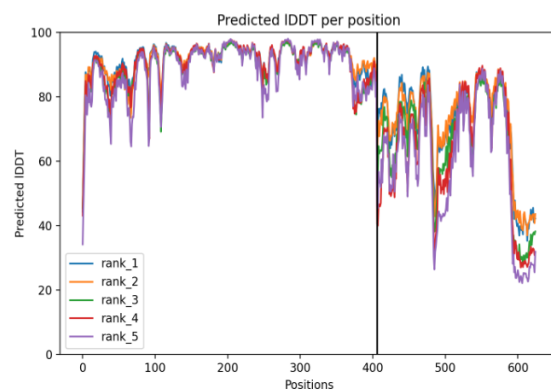**C**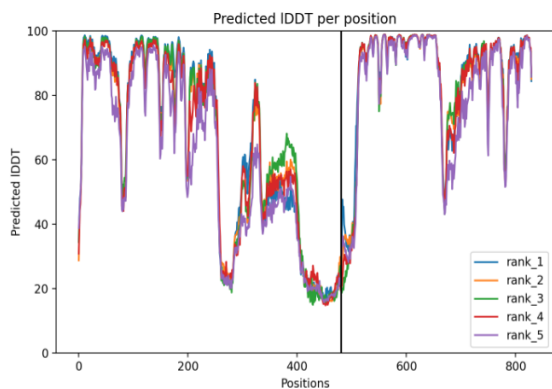**D**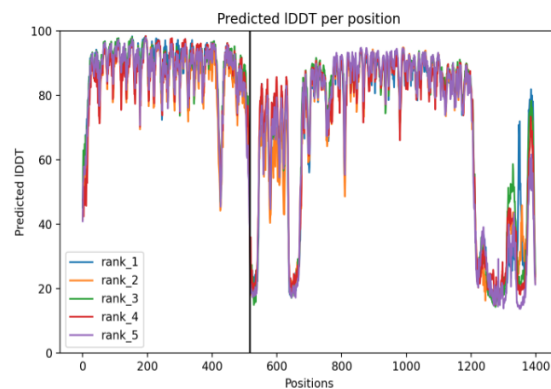**E**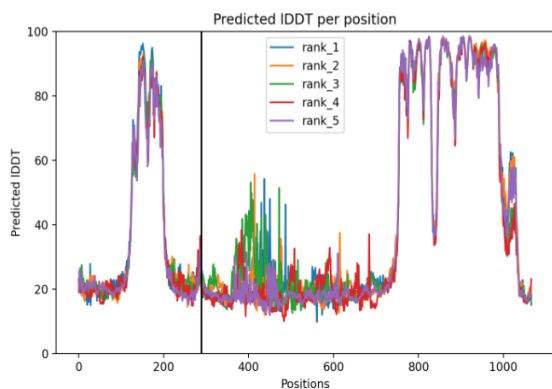**F**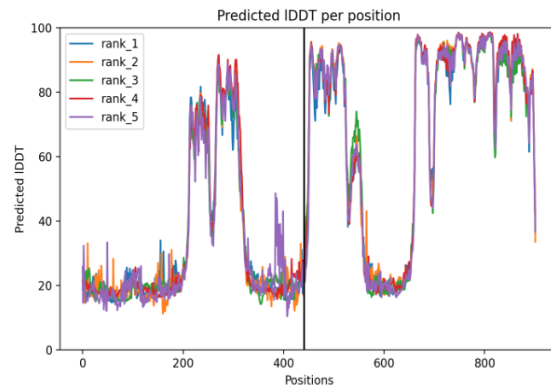

**Supplementary Figure 4. Per residue pLDDT scores for AlphaFold2-Multimer co-folded proteins.** Per amino acid position pLDDT scores for AlphaFold2-Multimer folds of A) KRAS(G12V) and RAF1, B) DNAJB1-PRKACA and HSPA8, C) PNPLA3 and ABHD5, D)  $\beta$ -Catenin and E-Cadherin, E) DLX5 and MAGED1, F) GATA4 and NR5A1.

**A**

SaLT&PepPr

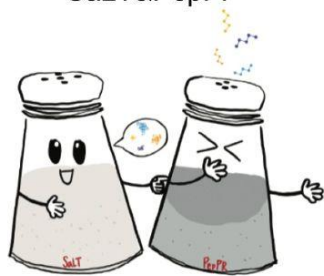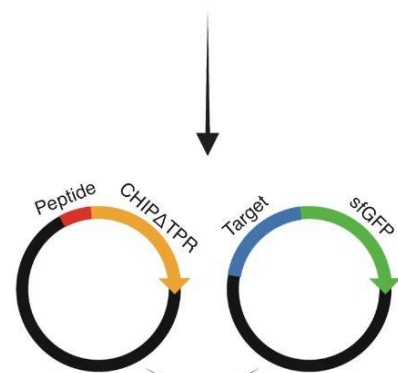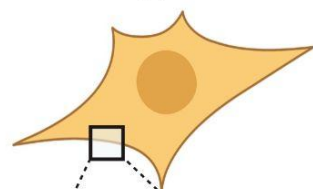

Intracellular target degradation

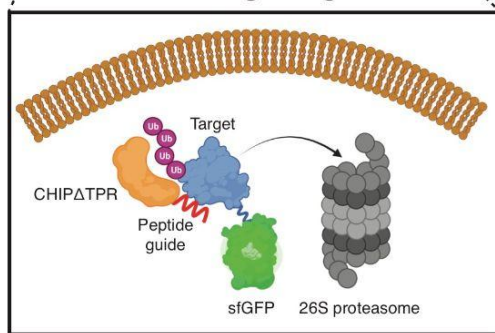

**B**

KRAS(G12V)

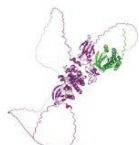

pLDDT: 66.8

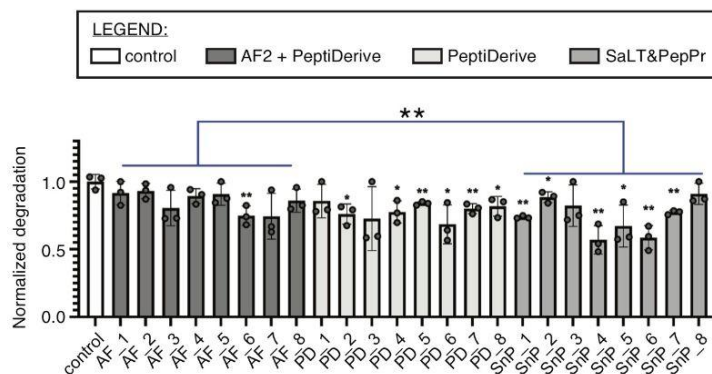

DLX5

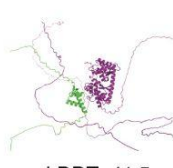

pLDDT: 41.5

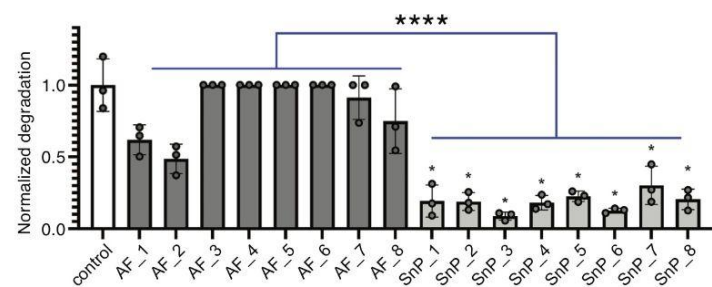

DNAJB1-PRKACA

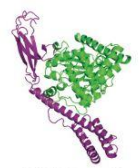

pLDDT: 84.7

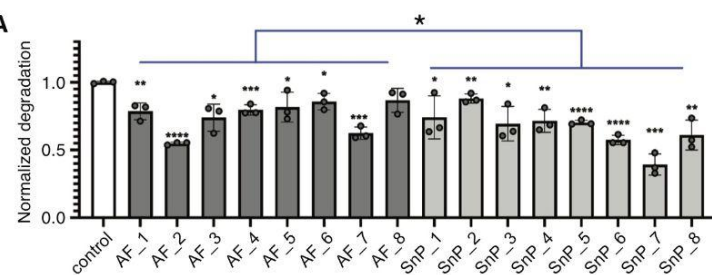

GATA4

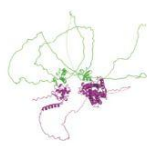

pLDDT: 50.9

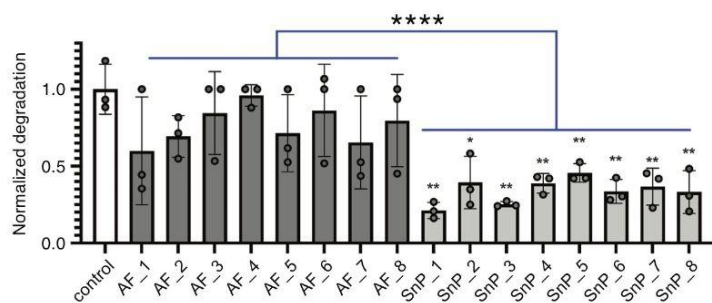

PNPLA3

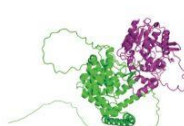

pLDDT: 73.3

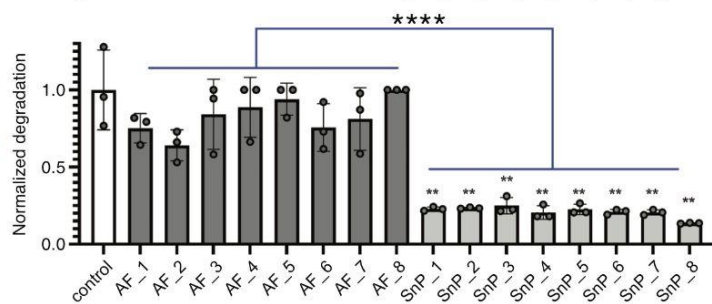

**Supplementary Figure 5. Characterization of SaLT&PepPr peptide-guided uAbs for diverse target protein degradation.** (A) Schematic of uAb degradation system. Briefly, SaLT&PepPr-derived peptides are fused to the N-terminus of CHIP $\Delta$ TPR in mammalian expression vectors. The resulting vectors are transiently co-transfected in cell lines along with a plasmid encoding the target protein fused to superfolder GFP (sfGFP) and uAb-mediated silencing of the target is quantified by measuring cell fluorescence. (B) Analyses of AlphaFold2-Multimer co-complexes (magenta = partner, green = target) and uAb-mediated sfGFP degradation via flow cytometry were conducted for the following targets (from top to bottom): KRAS (G12V) with interaction partner, RAF1 (PeptiDerive was conducted on PDB 6XHA); DLX5 with interaction partner, MAGED1; DNAJB1-PRKACA with interaction partner, HSPA8; GATA4 with interaction partner, NR5A1; and PNPLA3 with interaction partner, ABHD5. AlphaFold2 pLDDT scores (1-100) represent average model confidence across the entire co-complex sequence, with <70 being low confidence, 70-90 medium confidence, and >90 as high accuracy predictions. All experimental samples were performed in independent transfection triplicates ( $n = 3$ ) and gated on sfGFP fluorescence relative to the non-transfected control. Normalized degradation was calculated by dividing the percentage of sfGFP+ cells in a sample by that of the control for each target. For individual samples, statistical significance was determined by two-tailed Student's  $t$  test. For experimental comparison between groups (blue), a one-sided Mann-Whitney U Test was used to determine statistical significance for SaLT&PepPr (SnP) vs. the AlphaFold2-Multimer + PeptiDerive (AF) method or the PeptiDerive (PD) method. Calculated  $p$  values are represented as follows: \*,  $p < 0.05$ ; \*\*,  $p < 0.01$ ; \*\*\*,  $p < 0.001$ ; \*\*\*\*,  $p < 0.0001$ ; ns, not significant.



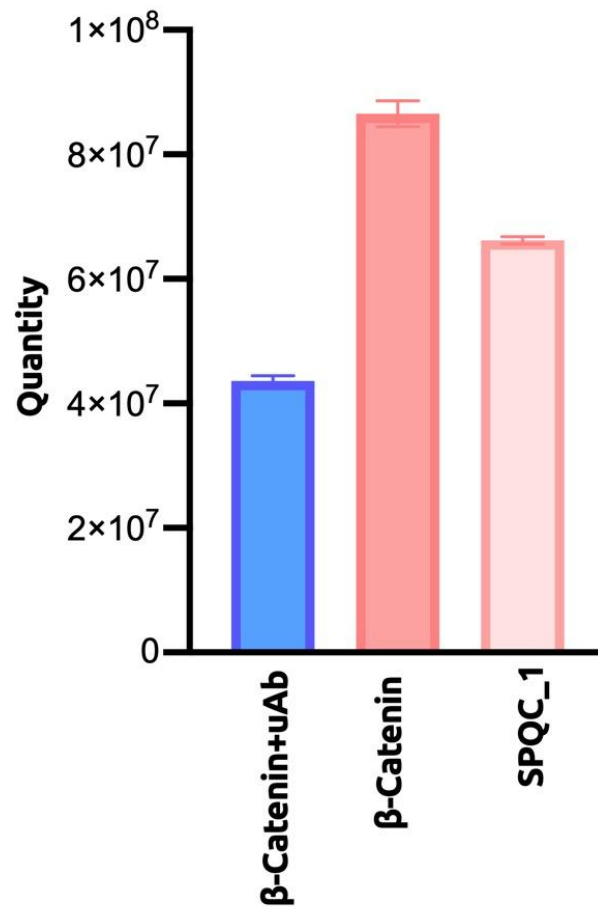

**Supplementary Figure 6. Validation of β-catenin degradation via mass spectrometry.** The abundances of β-Catenin (CTNNB1) were analyzed in triplicates with 1D-LCMS/MS in the presence and absence of the uAb and the SPQC pool. The average abundance of CTNNB1 was calculated for the triplicates and plotted using GraphPad Prism.

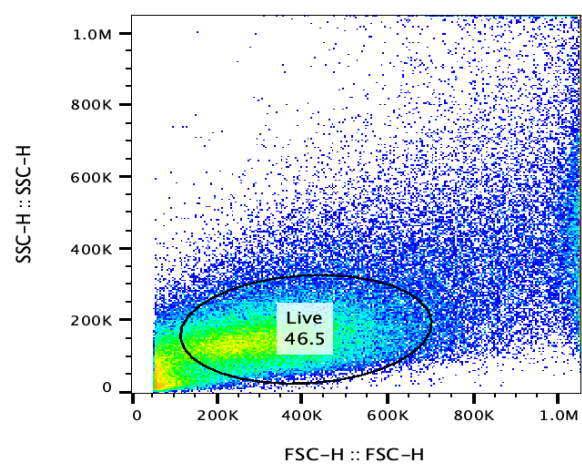

CTNNB1+E9.fcs  
Ungated  
122883

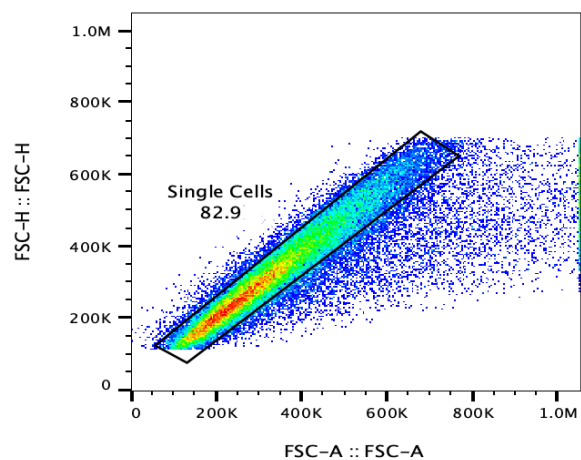

CTNNB1+E9.fcs  
Live  
57199

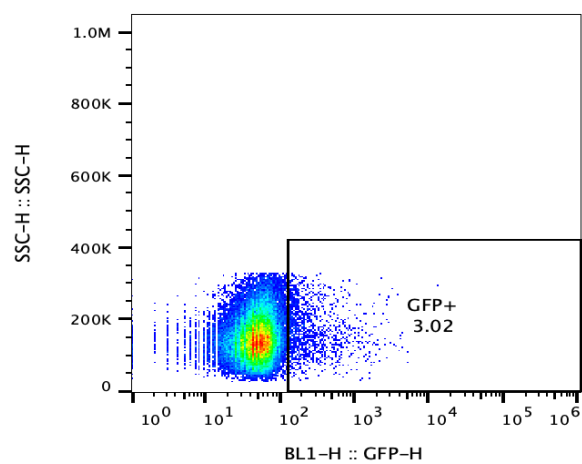

CTNNB1+E9.fcs  
Single Cells  
47394

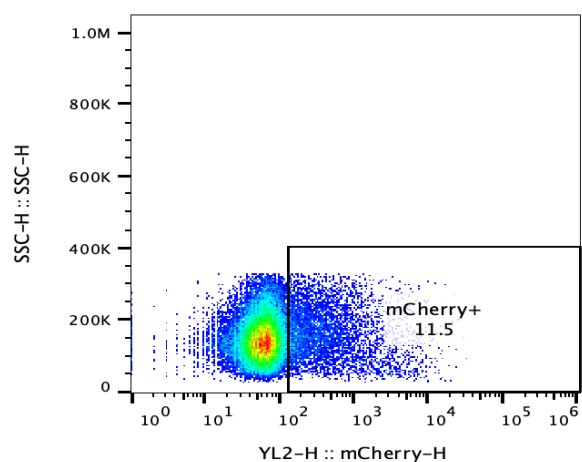

CTNNB1+E9.fcs  
Single Cells  
47394

**Supplementary Figure 7. Example gating strategy for flow cytometry.** ~10,000 gated events for data analysis based on default FSC/SSC parameters for HEK293T cells. The GFP+ and mCherry+ gates were established both by a GFP- negative control and an mCherry- control. All analysis was conducted in FlowJo.

**Supplementary Table 1. SaLT&PepPr-derived peptide sequences and scores.** Eight peptides were built per target protein based on specific binders using SaLT&PepPr (SnP) with provided scores indicating the cumulative binding site probability of the peptide. These were cloned into uAb constructs for subsequent analysis via flow cytometry.

| Target        | Binder | Peptide Name | Sequence            | SnP Score  |
|---------------|--------|--------------|---------------------|------------|
| DNAJB1-PRKACA | HSPA8  | DJ1PKA_SnP_1 | TERLIGDAAKNQVAMNPT  | 0.39120978 |
| DNAJB1-PRKACA | HSPA8  | DJ1PKA_SnP_2 | GDAAKNQVAMNPTNTVF   | 0.4198106  |
| DNAJB1-PRKACA | HSPA8  | DJ1PKA_SnP_3 | NKRAVRRLRTACERAKRT  | 0.3084646  |
| DNAJB1-PRKACA | HSPA8  | DJ1PKA_SnP_4 | QASIEIDSLYEGIDFYTS  | 0.42268646 |
| DNAJB1-PRKACA | HSPA8  | DJ1PKA_SnP_5 | KRNTTIPTKQTQTFTTYS  | 0.4849106  |
| DNAJB1-PRKACA | HSPA8  | DJ1PKA_SnP_6 | LLLLDVTPSLSLGIETAGG | 0.5474601  |
| DNAJB1-PRKACA | HSPA8  | DJ1PKA_SnP_7 | IEIDSLYEGID         | 0.44183227 |
| DNAJB1-PRKACA | HSPA8  | DJ1PKA_SnP_8 | TFTTYS DNQPGVLIQ    | 0.3081186  |
| PNPLA3        | ABHD5  | PNPLA3_SnP_1 | MAAEVEEVD SADTG     | 0.502174   |
| PNPLA3        | ABHD5  | PNPLA3_SnP_2 | YSSMFEDDTVTEYIYHCN  | 0.56430477 |
| PNPLA3        | ABHD5  | PNPLA3_SnP_3 | SMFEDDTVTEY         | 0.6153683  |
| PNPLA3        | ABHD5  | PNPLA3_SnP_4 | YSSMFEDDTVTEY       | 0.6076508  |
| PNPLA3        | ABHD5  | PNPLA3_SnP_5 | FEDDTVTEYIYHCNVQTP  | 0.5483647  |
| PNPLA3        | ABHD5  | PNPLA3_SnP_6 | CNVQTPSGETA FKNMTIP | 0.38931718 |
| PNPLA3        | ABHD5  | PNPLA3_SnP_7 | LAGLRIAGPFGLSLVQRL  | 0.5249392  |
| PNPLA3        | ABHD5  | PNPLA3_SnP_8 | GAALTPFNPLAGLRIAGP  | 0.4830475  |
| KRAS (G12V)   | RAF1   | KRAS_SnP_1   | LDHVPLTTHNFARKTFLK  | 0.7078685  |
| KRAS (G12V)   | RAF1   | KRAS_SnP_2   | AFCDICQK FLLNGFRCQ  | 0.73019314 |
| KRAS (G12V)   | RAF1   | KRAS_SnP_3   | AFCDICQK FLLNGFRCQT | 0.72925234 |
| KRAS (G12V)   | RAF1   | KRAS_SnP_4   | CQK FLLNGFRCQT      | 0.7296444  |
| KRAS (G12V)   | RAF1   | KRAS_SnP_5   | DWSNIRQLLLFPN       | 0.56445897 |
| KRAS (G12V)   | RAF1   | KRAS_SnP_6   | QGMDYLHAKNI         | 0.23349328 |
| KRAS (G12V)   | RAF1   | KRAS_SnP_7   | HINN RDQIIFMVGRGY   | 0.48506093 |
| KRAS (G12V)   | RAF1   | KRAS_SnP_8   | FARKTFLKLAFC DICQ   | 0.7431202  |

|           |        |             |                        |            |
|-----------|--------|-------------|------------------------|------------|
| β-catenin | CADH1  | β-cat_SnP_1 | DYEGSGSEAASSLNSESDDKDQ | 0.509226   |
| β-catenin | CADH1  | β-cat_SnP_2 | YDSLLVFDYE             | 0.39451852 |
| β-catenin | CADH1  | β-cat_SnP_3 | AADTDPTAPPYDSLLVFDYE   | 0.36254913 |
| β-catenin | CADH1  | β-cat_SnP_4 | PTAPPYDSLLVFDYE        | 0.38101247 |
| β-catenin | CADH1  | β-cat_SnP_5 | YDSLLVFDYEG            | 0.40408888 |
| β-catenin | CADH1  | β-cat_SnP_6 | TAPPYDSLLVFDYE         | 0.38535473 |
| β-catenin | CADH1  | β-cat_SnP_7 | DPTAPPYDSLLVFDYEGS     | 0.39557245 |
| β-catenin | CADH1  | β-cat_SnP_8 | PTAPPYDSLLVFDYEG       | 0.38843626 |
| DLX5      | MAGED1 | DLX5_SnP_1  | ADEALDALDAAA           | 0.7373449  |
| DLX5      | MAGED1 | DLX5_SnP_2  | LAGILGTTKDTP           | 0.70572895 |
| DLX5      | MAGED1 | DLX5_SnP_3  | EHLYILISTPES           | 0.69121355 |
| DLX5      | MAGED1 | DLX5_SnP_4  | ISTPESLAGILG           | 0.6980049  |
| DLX5      | MAGED1 | DLX5_SnP_5  | KEEHLYILISTP           | 0.6835796  |
| DLX5      | MAGED1 | DLX5_SnP_6  | FGIQLKEIDKEE           | 0.61468536 |
| DLX5      | MAGED1 | DLX5_SnP_7  | QLKEIDKEEHLY           | 0.63843673 |
| DLX5      | MAGED1 | DLX5_SnP_8  | GAAQPRDVALLQ           | 0.61574763 |
| GATA4     | NR5A1  | GATA4_SnP_1 | CGDKFQQLLLCL           | 0.6886584  |
| GATA4     | NR5A1  | GATA4_SnP_2 | CHYPHCGDKFQQ           | 0.67182046 |
| GATA4     | NR5A1  | GATA4_SnP_3 | DYTLCHYPHCGD           | 0.664633   |
| GATA4     | NR5A1  | GATA4_SnP_4 | ANAALLDYTLCH           | 0.67642945 |
| GATA4     | NR5A1  | GATA4_SnP_5 | ALLDYTLCHYPH           | 0.66024536 |
| GATA4     | NR5A1  | GATA4_SnP_6 | PPPPPAPDYVLP           | 0.41717997 |
| GATA4     | NR5A1  | GATA4_SnP_7 | LPPSLHGPEPKG           | 0.411788   |
| GATA4     | NR5A1  | GATA4_SnP_8 | YVLPSSLHGPEP           | 0.41301522 |

**Supplementary Table 2. AlphaFold2-Multimer+PeptiDerive-derived peptide sequences.** Eight peptides were built per target protein based on specific binders using AlphaFold2-Multimer + PeptiDerive (AF2 + Peptiderive) and PeptiDerive only. These were cloned into uAb constructs for subsequent analysis via flow cytometry.

| Target        | Binder | Method          | Peptide Name | Sequence            |
|---------------|--------|-----------------|--------------|---------------------|
| DNAJB1-PRKACA | HSPA8  | AF2+PeptiDerive | DJ1PKA_AF2_1 | AAILSGDKSENVQDLLLL  |
| DNAJB1-PRKACA | HSPA8  | AF2+PeptiDerive | DJ1PKA_AF2_2 | AILSGDKSENVQDLLLLLD |
| DNAJB1-PRKACA | HSPA8  | AF2+PeptiDerive | DJ1PKA_AF2_3 | ILSGDKSENVQDLLLLLDV |
| DNAJB1-PRKACA | HSPA8  | AF2+PeptiDerive | DJ1PKA_AF2_4 | LSGDKSENVQDLLLLLDVT |
| DNAJB1-PRKACA | HSPA8  | AF2+PeptiDerive | DJ1PKA_AF2_5 | QAAILSGDKSENVQDLLL  |
| DNAJB1-PRKACA | HSPA8  | AF2+PeptiDerive | DJ1PKA_AF2_6 | VQAAILSGDKSENVQDLL  |
| DNAJB1-PRKACA | HSPA8  | AF2+PeptiDerive | DJ1PKA_AF2_7 | PRGVPQIEVTFDIDANGI  |
| DNAJB1-PRKACA | HSPA8  | AF2+PeptiDerive | DJ1PKA_AF2_8 | LLLDVTPLSLGIETAGGV  |
| PNPLA3        | ABHD5  | AF2+PeptiDerive | PNPLA3_AF_1  | LADQDRPIP VWI       |
| PNPLA3        | ABHD5  | AF2+PeptiDerive | PNPLA3_AF_2  | QDRPIP VWIRAL       |
| PNPLA3        | ABHD5  | AF2+PeptiDerive | PNPLA3_AF_3  | DRPIP VWIRALG       |
| PNPLA3        | ABHD5  | AF2+PeptiDerive | PNPLA3_AF_4  | ADQDRPIP VWIR       |
| PNPLA3        | ABHD5  | AF2+PeptiDerive | PNPLA3_AF_5  | DQDRPIP VWIRA       |
| PNPLA3        | ABHD5  | AF2+PeptiDerive | PNPLA3_AF_6  | PIPVWIRALGAA        |
| PNPLA3        | ABHD5  | AF2+PeptiDerive | PNPLA3_AF_7  | RPIP VWIRALGA       |
| PNPLA3        | ABHD5  | AF2+PeptiDerive | PNPLA3_AF_8  | IPVWIRALGAAL        |
| KRAS          | 6XHA   | PeptiDerive     | KRAS_PD_1    | SNTIRVFLPNKQRTVVNV  |
| KRAS          | 6XHA   | PeptiDerive     | KRAS_PD_2    | NTIRVFLPNKQRTVVNVR  |
| KRAS          | 6XHA   | PeptiDerive     | KRAS_PD_3    | TIRVFLPNKQRTVVNVRN  |
| KRAS          | 6XHA   | PeptiDerive     | KRAS_PD_4    | IRVFLPNKQRTVVNVRNG  |
| KRAS          | 6XHA   | PeptiDerive     | KRAS_PD_5    | RVFLPNKQRTVVNVRNGM  |
| KRAS          | 6XHA   | PeptiDerive     | KRAS_PD_6    | VFLPNKQRTVVNVRNGMS  |
| KRAS          | 6XHA   | PeptiDerive     | KRAS_PD_7    | GFRCQTCGYKFHEHCSTK  |
| KRAS          | 6XHA   | PeptiDerive     | KRAS_PD_8    | LNGFRCQTCGYKFHEHCS  |
| KRAS (G12V)   | RAF1   | AF2+PeptiDerive | KRAS_AF2_1   | NTIRVFLPNKQRTVVNVR  |

|                  |        |                 |                   |                    |
|------------------|--------|-----------------|-------------------|--------------------|
| KRAS (G12V)      | RAF1   | AF2+PeptiDerive | KRAS_AF2_2        | TIRVFLPNKQRTVVNVRN |
| KRAS (G12V)      | RAF1   | AF2+PeptiDerive | KRAS_AF2_3        | SNTIRVFLPNKQRTVVNV |
| KRAS (G12V)      | RAF1   | AF2+PeptiDerive | KRAS_AF2_4        | IRVFLPNKQRTVVNVRNG |
| KRAS (G12V)      | RAF1   | AF2+PeptiDerive | KRAS_AF2_5        | RVFLPNKQRTVVNVRNGM |
| KRAS (G12V)      | RAF1   | AF2+PeptiDerive | KRAS_AF2_6        | VFLPNKQRTVVNVRNGMS |
| KRAS (G12V)      | RAF1   | AF2+PeptiDerive | KRAS_AF2_7        | FRCQTCGYKFHEHCSTKV |
| KRAS (G12V)      | RAF1   | AF2+PeptiDerive | KRAS_AF2_8        | GFRCQTCGYKFHEHCSTK |
| $\beta$ -catenin | CADH1  | AF2+PeptiDerive | $\beta$ -cat_AF_1 | EWGNRFKKLADM       |
| $\beta$ -catenin | CADH1  | AF2+PeptiDerive | $\beta$ -cat_AF_2 | LNEWGNRFKKLA       |
| $\beta$ -catenin | CADH1  | AF2+PeptiDerive | $\beta$ -cat_AF_3 | NEWGNRFKKLAD       |
| $\beta$ -catenin | CADH1  | AF2+PeptiDerive | $\beta$ -cat_AF_4 | YLNEWGNRFKKL       |
| $\beta$ -catenin | CADH1  | AF2+PeptiDerive | $\beta$ -cat_AF_5 | WGNRFKKLADMY       |
| $\beta$ -catenin | CADH1  | AF2+PeptiDerive | $\beta$ -cat_AF_6 | RFKKLADMYGGG       |
| $\beta$ -catenin | CADH1  | AF2+PeptiDerive | $\beta$ -cat_AF_7 | NRFKKLADMYGG       |
| $\beta$ -catenin | CADH1  | AF2+PeptiDerive | $\beta$ -cat_AF_8 | GNRFKKLADMYG       |
| DLX5             | MAGED1 | AF2+PeptiDerive | DLX5_AF_1         | LLTWDEEGDFGD       |
| DLX5             | MAGED1 | AF2+PeptiDerive | DLX5_AF_2         | ELLTWDEEGDFG       |
| DLX5             | MAGED1 | AF2+PeptiDerive | DLX5_AF_3         | WARYHQNARSRF       |
| DLX5             | MAGED1 | AF2+PeptiDerive | DLX5_AF_4         | FWARYHQNARSR       |
| DLX5             | MAGED1 | AF2+PeptiDerive | DLX5_AF_5         | TFWARYHQNARS       |
| DLX5             | MAGED1 | AF2+PeptiDerive | DLX5_AF_6         | FTFWARYHQNAR       |
| DLX5             | MAGED1 | AF2+PeptiDerive | DLX5_AF_7         | PFTFWARYHQNA       |
| DLX5             | MAGED1 | AF2+PeptiDerive | DLX5_AF_8         | IPFTFWARYHQN       |
| GATA4            | NR5A1  | AF2+PeptiDerive | GATA4_AF_1        | LQLLALQLDRQE       |
| GATA4            | NR5A1  | AF2+PeptiDerive | GATA4_AF_2        | LLALQLDRQEFV       |
| GATA4            | NR5A1  | AF2+PeptiDerive | GATA4_AF_3        | QLLALQLDRQEF       |
| GATA4            | NR5A1  | AF2+PeptiDerive | GATA4_AF_4        | QELVLQLLALQL       |
| GATA4            | NR5A1  | AF2+PeptiDerive | GATA4_AF_5        | ELVLQLLALQLD       |
| GATA4            | NR5A1  | AF2+PeptiDerive | GATA4_AF_6        | LVLQLLALQLDR       |

|       |       |                 |            |              |
|-------|-------|-----------------|------------|--------------|
| GATA4 | NR5A1 | AF2+PeptiDerive | GATA4_AF_7 | VLQLLALQLDRQ |
| GATA4 | NR5A1 | AF2+PeptiDerive | GATA4_AF_8 | LALQLDRQEFVC |
